# Supplementary material
Source: publisher site journal article supplement (https://www.dovepress.com/article/511364)
Supplement: Supplementary file 1 [file get_supplementary_file.php]

**Survival benefits of** **Transarterial Chemoembolization plus Ablation Therapy in patients with intermediate or advanced hepatocellular carcinoma: a propensity score matching study**

**Supplementary files**


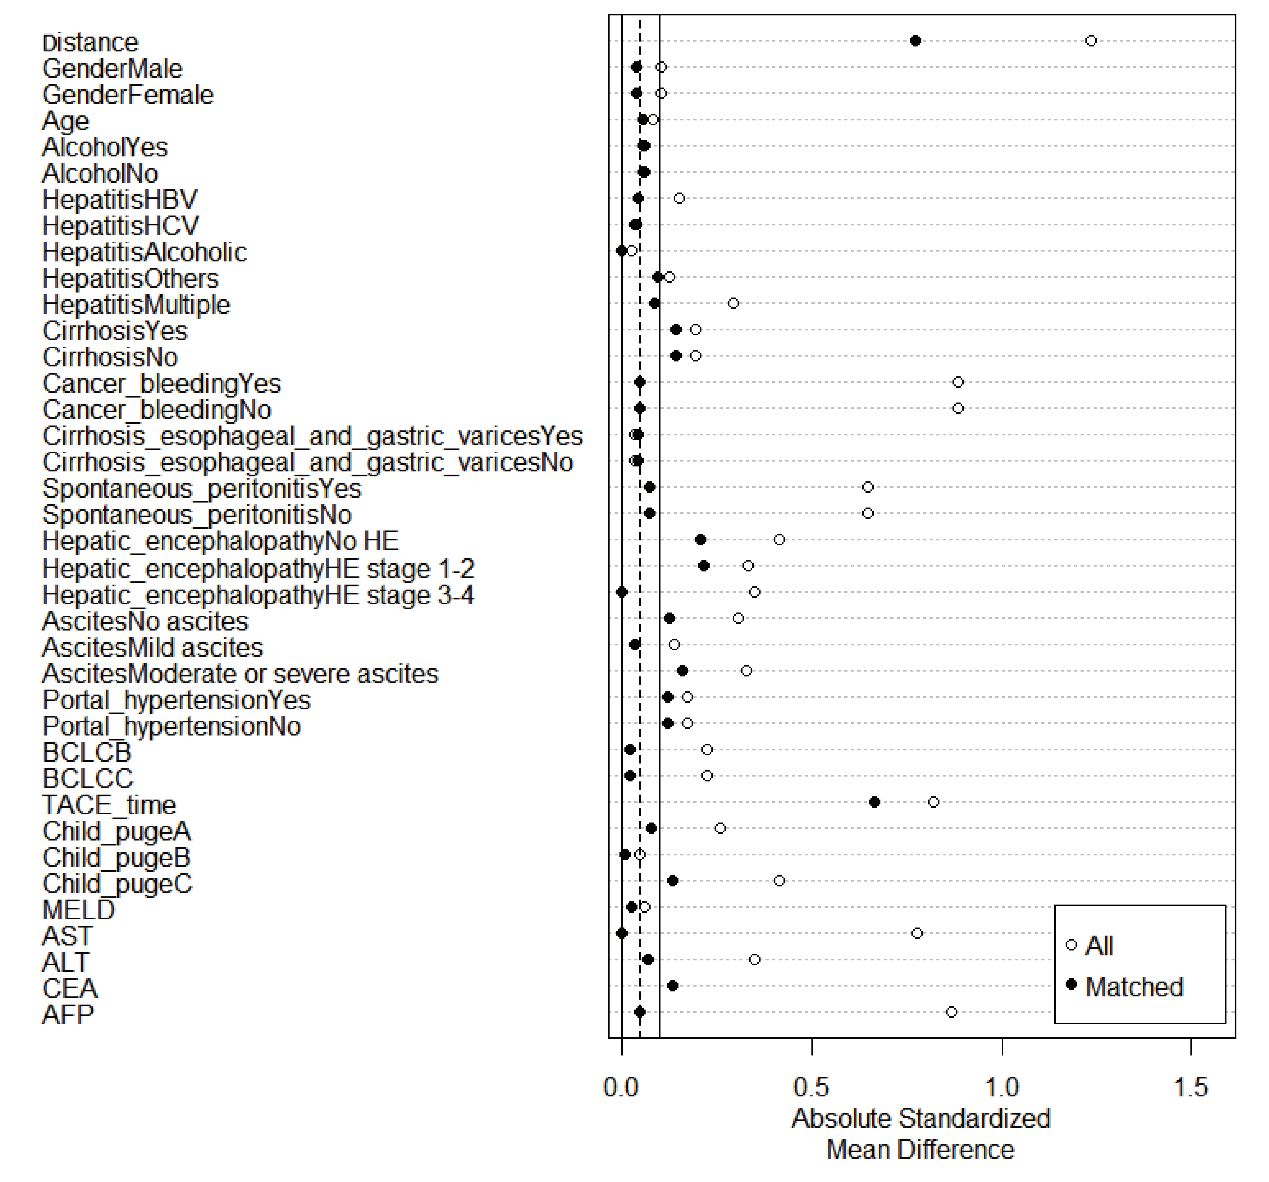
**Figure S1** The absolute standardized mean differences of OS before and after PSM.

**Abbreviations:** OS, overall survival; PSM, propensity score matching; HBV, hepatitis B virus; HCV, hepatitis C virus; BCLC, Barcelona Clinic Liver Cancer; MELD, model for end-stage liver disease; AST, aminotransferase; ALT, alanine aminotransferase; CEA, carcinoembryonic antigen; AFP, alpha-fetoprotein.


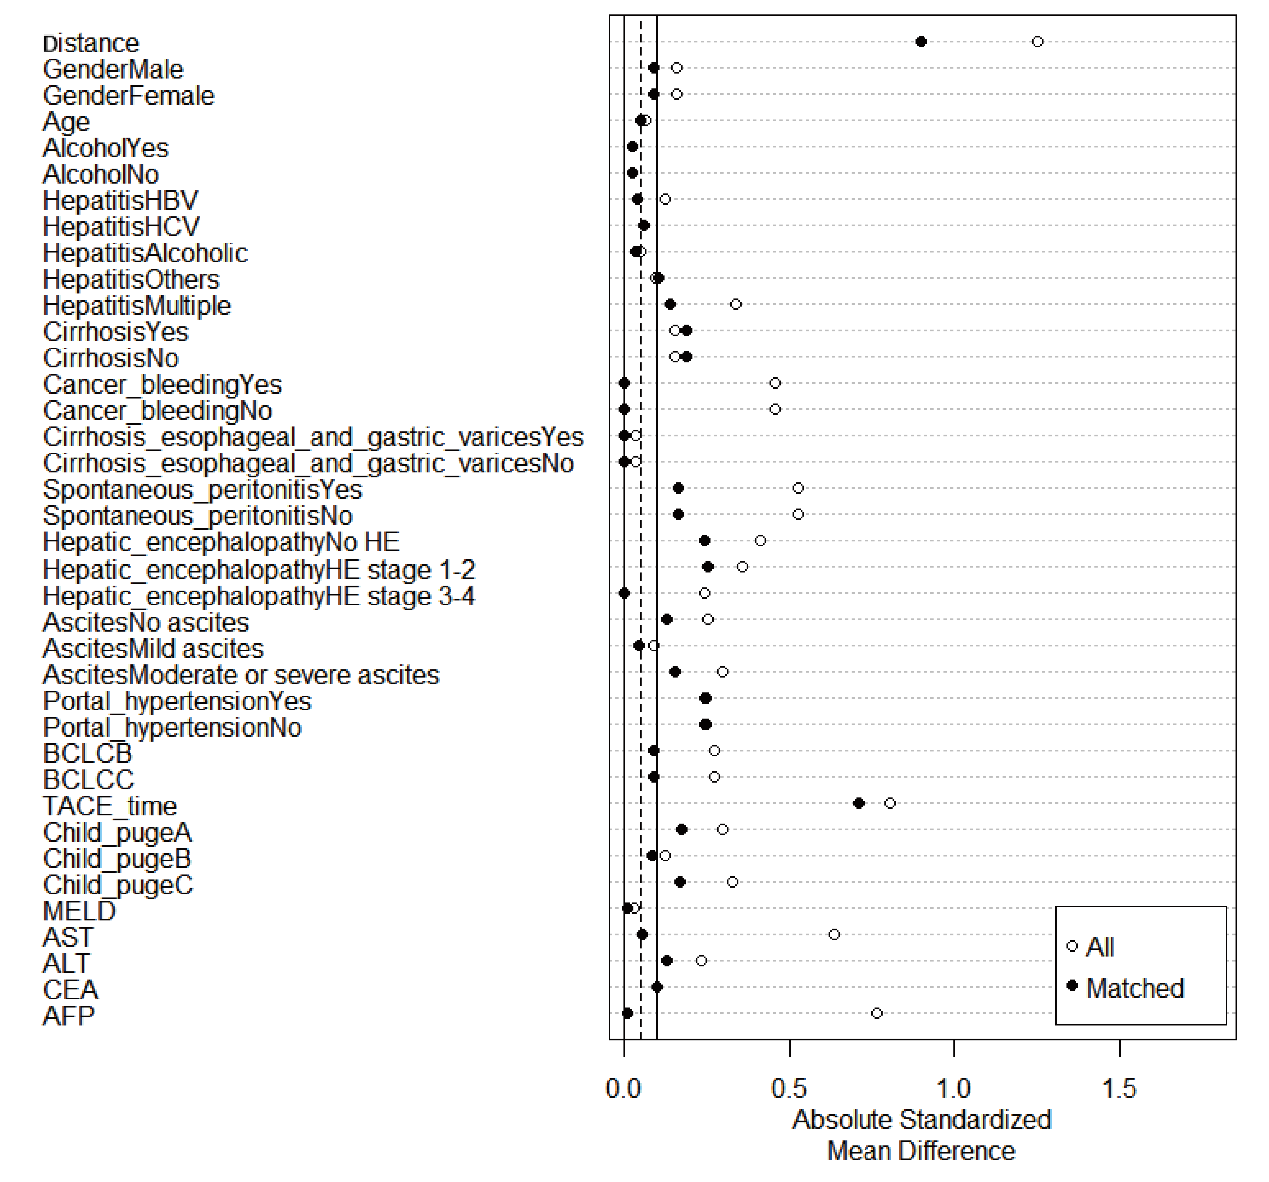
**Figure S2** The absolute standardized mean differences of PFS before and after PSM.

**Abbreviations:** PSM, propensity score matching; PFS, progression free survival; HBV, hepatitis B virus; HCV, hepatitis C virus; BCLC, Barcelona Clinic Liver Cancer; MELD, Model for end-stage liver disease; AST, aminotransferase; ALT, alanine aminotransferase; CEA, Carcinoembryonic antigen; AFP, Alpha-Fetoprotein.


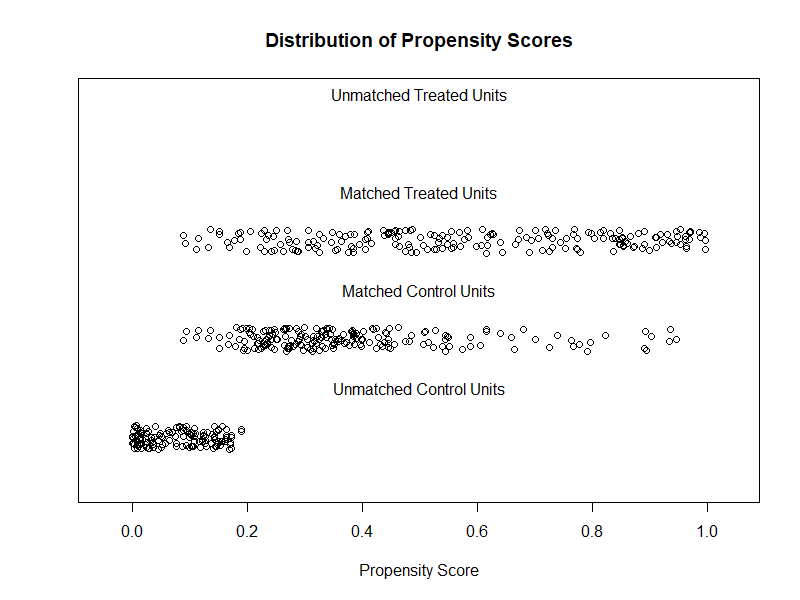


**Figure S3** Propensity Score Distribution of OS before and after PSM.

**Abbreviations:** OS, overall survival; PSM, propensity score matching
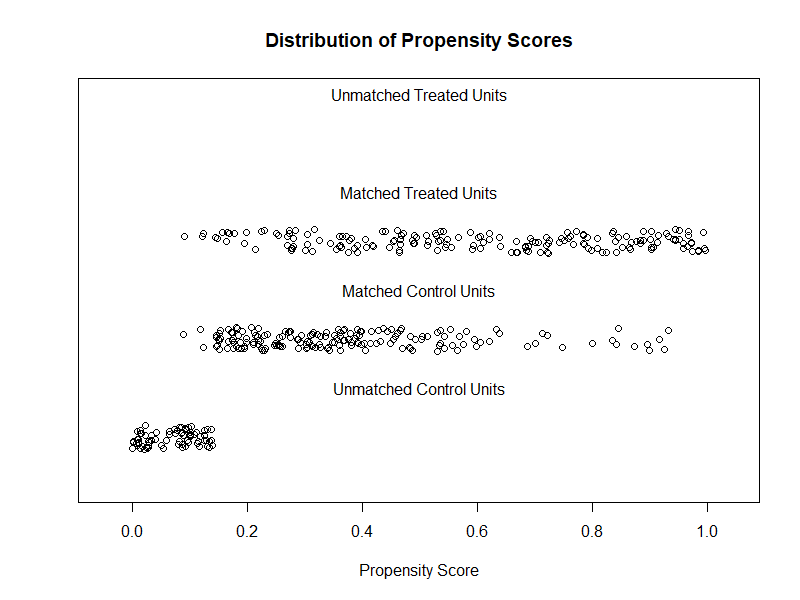
**Figure S4** Propensity Score Distribution of PFS before and after PSM.

**Abbreviations:** PFS, Progression free survival; PSM, propensity score matching


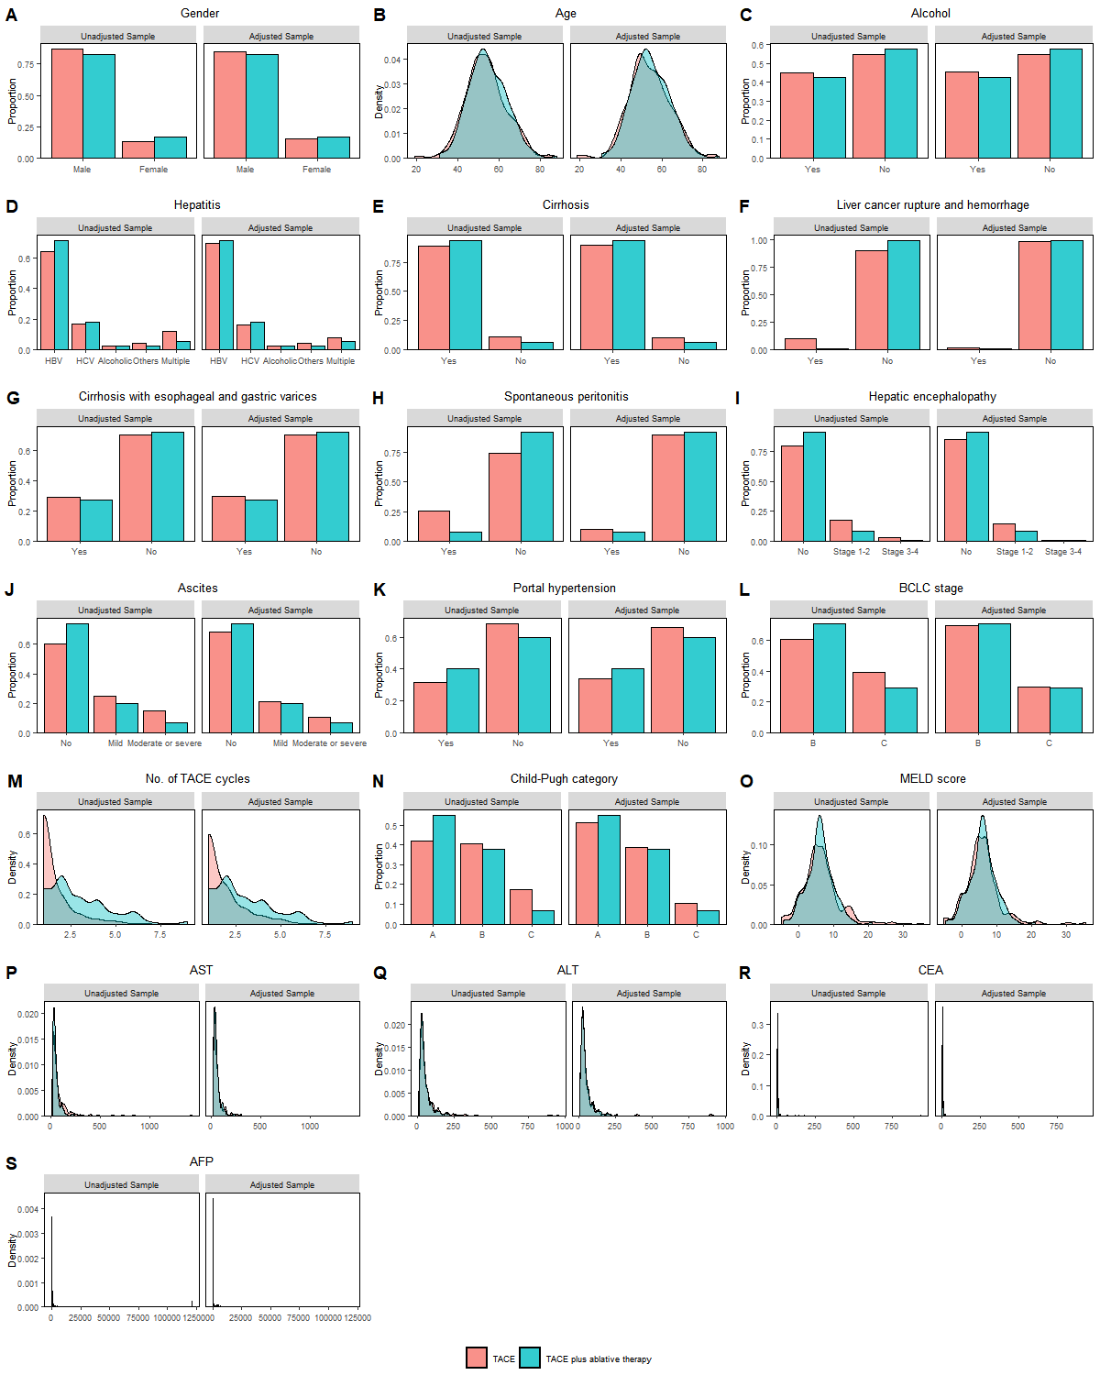
**Figure S5** Histogram and density curve of OS before and after PSM.(A) Gender; (B) Age; (C) Alcohol; (D) Hepatitis; (E) Cirrhosis; (F) Liver Cancer Rupture and Bleeding; (G) Cirrhosis with esophageal and gastric varices; (H) Spontaneous peritonitis; (I) Hepatic encephalopathy; (J) Ascites; (K) Portal hypertension; (L) BCLC stage; (M) No. of TACE cycles; (N) Child-Pugh category; (O) MELD score; (P) AST; (Q) ALT; (R) CEA; (S) AFP.

**Abbreviations:** OS, overall survival; PSM, propensity score matching; BCLC, Barcelona Clinic Liver Cancer; MELD, model for end-stage liver disease; AST, aminotransferase; ALT, alanine aminotransferase; CEA, carcinoembryonic antigen; AFP, alpha-fetoprotein.


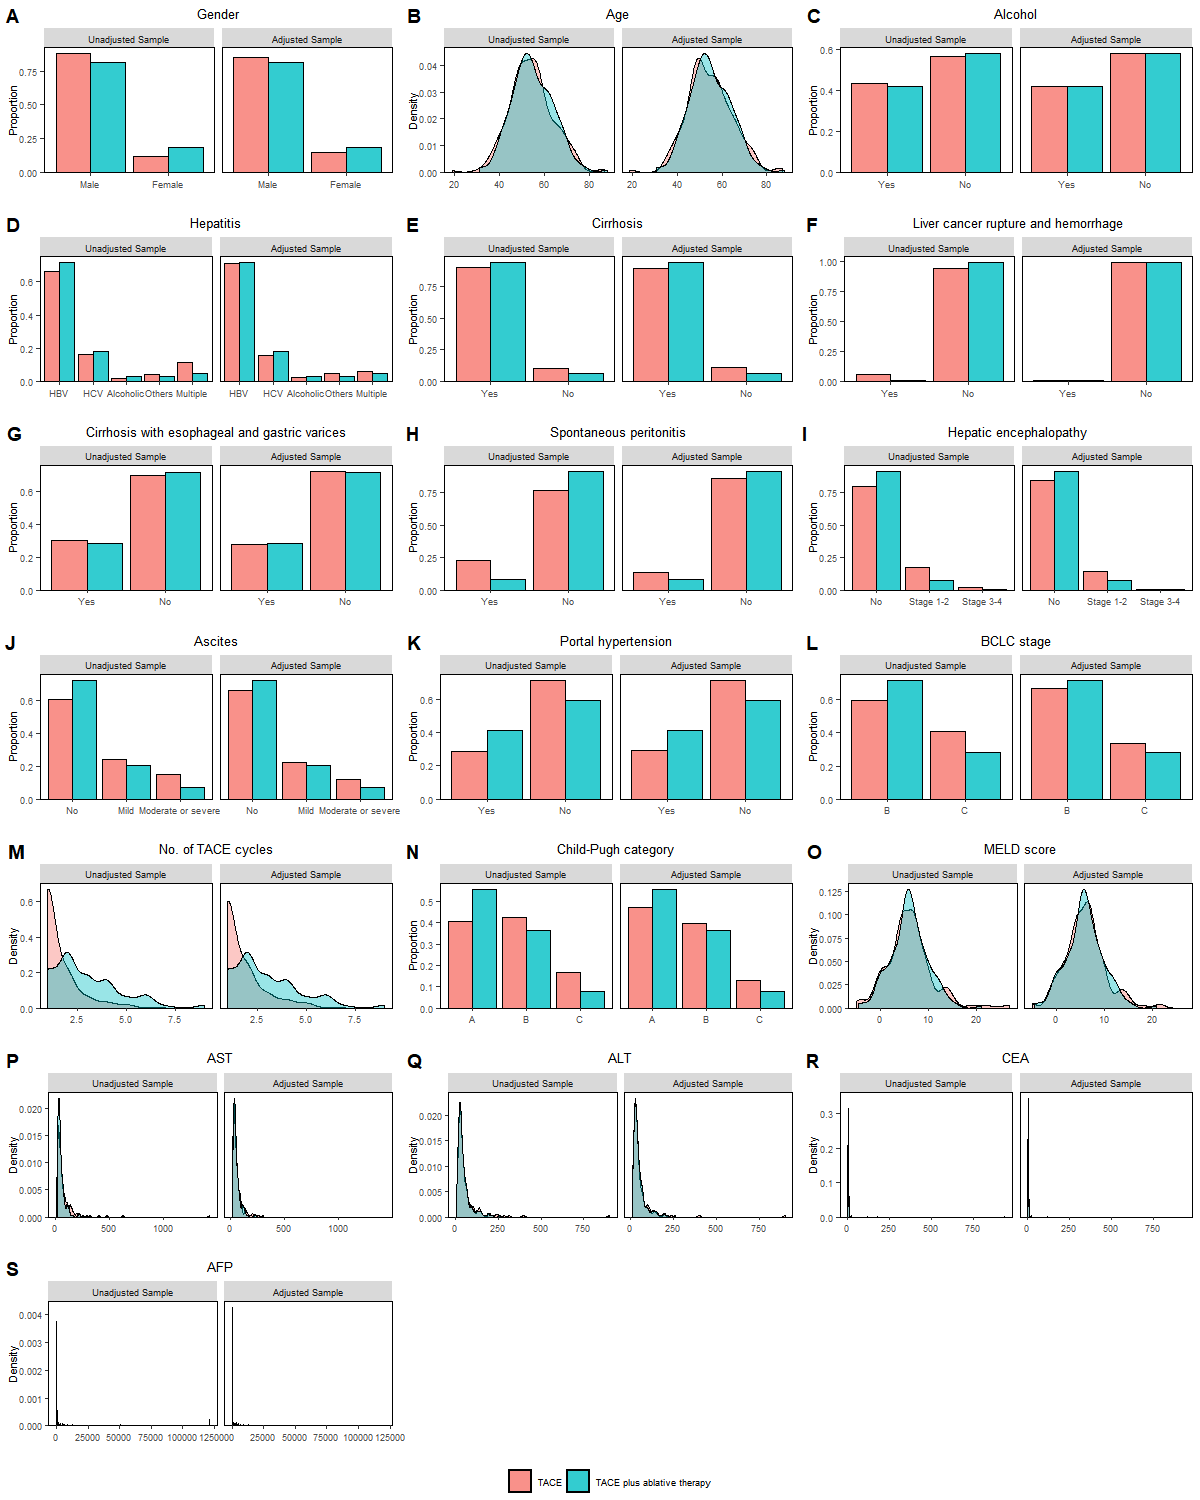
**Figure S6** Histogram and density curve of PFS before and after PSM.(A) Gender; (B) Age; (C) Alcohol; (D) Hepatitis; (E) Cirrhosis; (F) Liver Cancer Rupture and Bleeding; (G) Cirrhosis with esophageal and gastric varices; (H) Spontaneous peritonitis; (I) Hepatic encephalopathy; (J) Ascites; (K) Portal hypertension; (L) BCLC stage; (M) No**.** of TACE cycles; (N) Child-Pugh category; (O) MELD score; (P) AST; (Q) ALT; (R) CEA; (S) AFP.

**Abbreviations:** PFS, Progression free survival; PSM, Propensity score matching; BCLC, Barcelona Clinic Liver Cancer; MELD, Model for end-stage liver disease; AST, Aminotransferase; ALT, Alanine aminotransferase; CEA, Carcinoembryonic antigen; AFP, Alpha-Fetoprotein.
